# Supplementary material for: Optimal construction of Co 3 O 4 /Cu 2 O photo-assisted electrodes for aqueous Zn-ion hybrid capacitors: performance and mechanism
Source: Royal Society of Chemistry journal article supplement (doi:10.1039/d5nj03204k), 2025-01-01
Supplement: d5nj03204k1.pdf [file d5nj03204k1.pdf]

**Optimal construction of  $\text{Co}_3\text{O}_4/\text{Cu}_2\text{O}$  photo-assisted electrode for aqueous Zn-ion hybrid capacitor: performance and mechanism**

Yuan Liu <sup>a,b</sup>, Ming Li <sup>a,b\*</sup>, Qingqing Song <sup>a,b</sup>, Yuancheng Hou <sup>a,b</sup>, Yingjia Wang <sup>a,b</sup>

<sup>a</sup> Key Laboratory of surface and interface electrochemistry, Education Department of Guangxi Zhuang Autonomous Region, College of Chemical and Bioengineering, Guilin University of Technology, Guilin 541004, China

<sup>b</sup> Guangxi Key Laboratory of Electrochemical and Magnetochemical Functional Materials, College of Chemical and Biologic Engineering, Guilin University of Technology, Guilin 541004, China.

\* Correspondence to: M. Li, E-mail address: [liming9989@163.com](mailto:liming9989@163.com), Tel: 086-0773-8996098

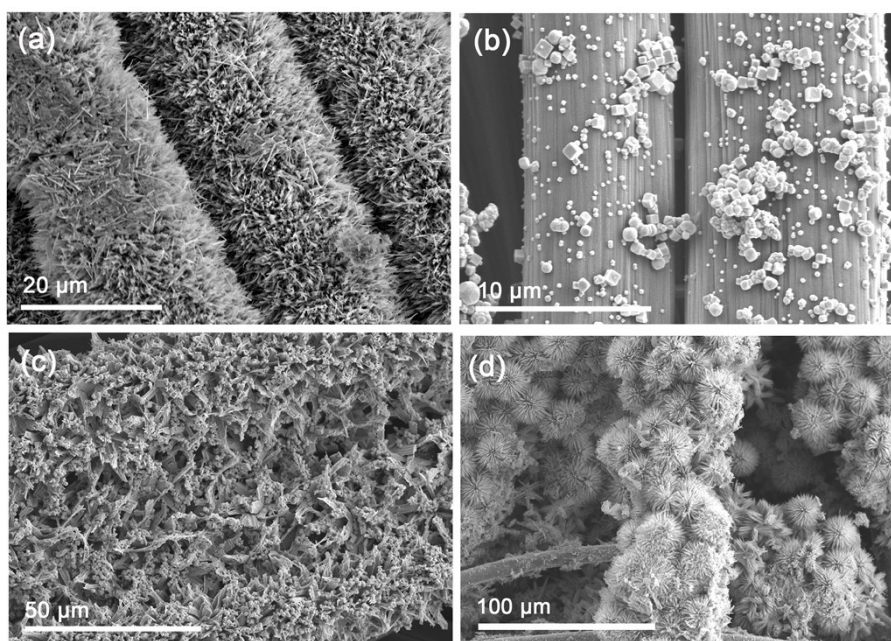

Fig.S1 SEM images of (a)  $\text{Co}_3\text{O}_4$ , (b)  $\text{Cu}_2\text{O}$ , (c) OC2, and (d) UC2

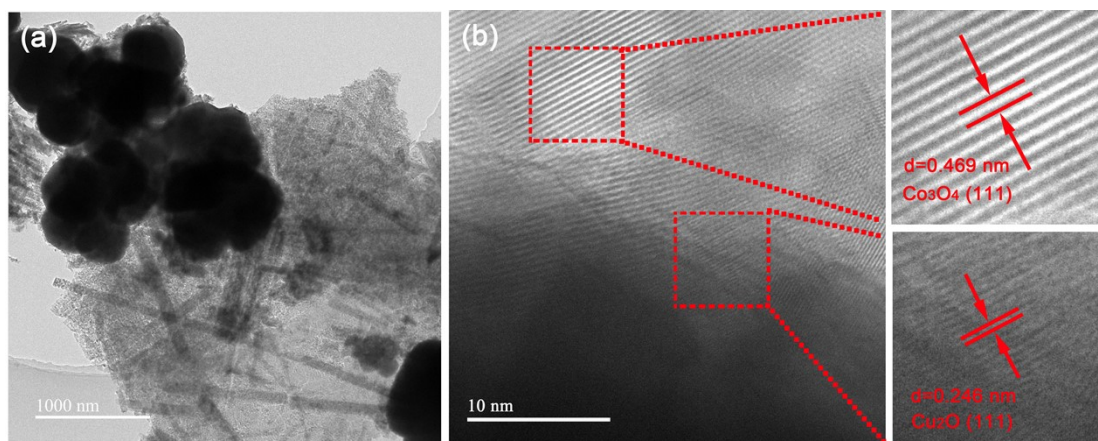

Fig.S2 (a) TEM image and (b) HRTEM image of UC2

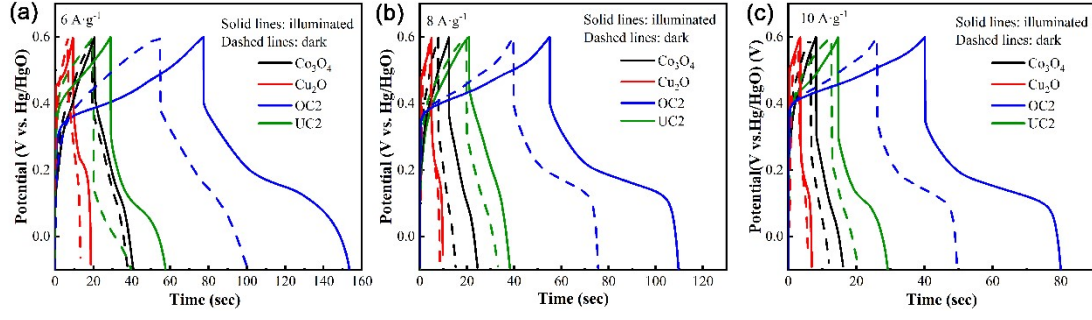

Fig.S3 GCD profiles of the electrodes measured in dark and under illumination at (a)  $6 \text{ A} \cdot \text{g}^{-1}$ , (b)  $8 \text{ A} \cdot \text{g}^{-1}$ , and (c)  $10 \text{ A} \cdot \text{g}^{-1}$ .

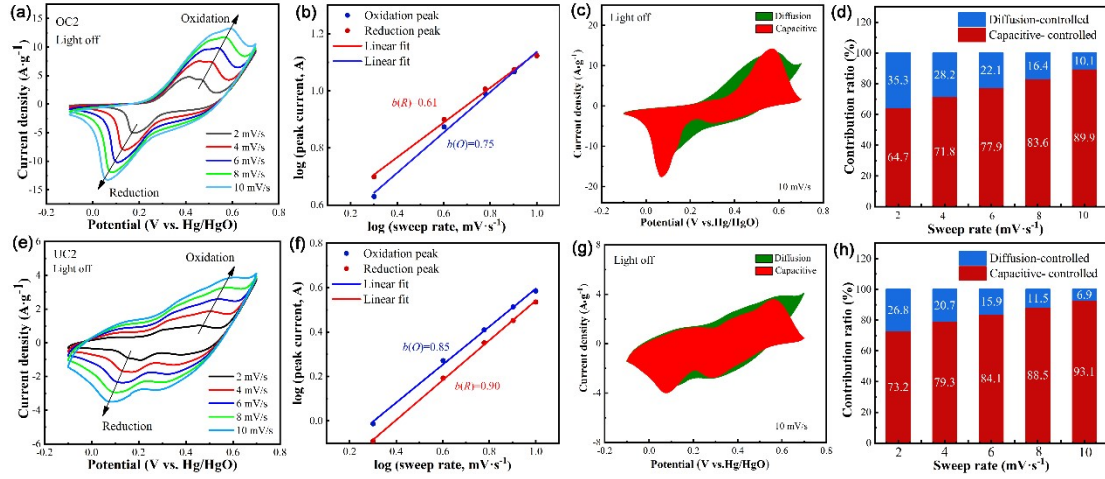

Fig.S4 CV curves at 2~10 mV/s (a, e), plots of  $\lg i_p$  vs.  $\lg v$  (b, f), the capacitive contribution at 10  $\text{mV} \cdot \text{s}^{-1}$  (c, g), and the quantitative surface and diffusion contributions at various scan rates (d, h) for OC2 and UC2 in dark, respectively.

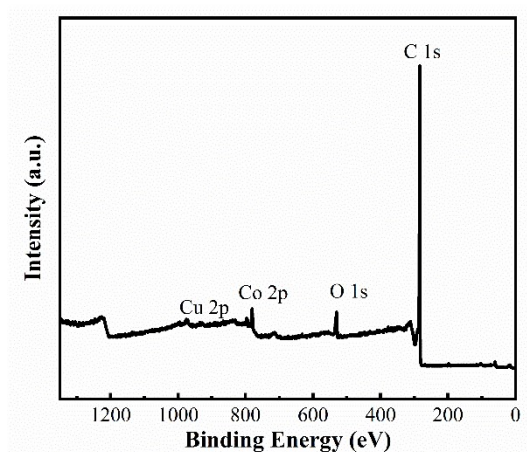

Fig.S5 XPS fully scanned spectra of charged OC2

Table S1 The fitted data of TRPL decay curves

| Sample                         | $\tau$ (ns)        | B              | $\tau_{\text{ave}}$ (ns) | $R_0$   |
|--------------------------------|--------------------|----------------|--------------------------|---------|
| Co <sub>3</sub> O <sub>4</sub> | $\tau_1=24.44949$  | $B_1=0.29387$  | 148.3671                 | 0.25739 |
|                                | $\tau_1=160.45183$ | $B_2=0.45895$  |                          |         |
| Cu <sub>2</sub> O              | $\tau_1=26.45876$  | $B_1=0.29319$  | 189.8003                 | 0.34643 |
|                                | $\tau_2=208.47588$ | $B_2=0.32545$  |                          |         |
| UC2                            | $\tau_1=0.64907$   | $B_1=8.20768$  | 79.32489                 | 0.13986 |
|                                | $\tau_2=95.78667$  | $B_2=0.26581$  |                          |         |
| OC2                            | $\tau_1=0.54287$   | $B_1=15.35492$ | 71.97886                 | 0.0632  |
|                                | $\tau_2=95.14085$  | $B_2=0.27022$  |                          |         |
